# Supplementary material
Source: Springer Nature journal article supplement (https://www.springermedizin.de/resource/supplementary/12885_2013_4051_MOESM1_ESM.pdf/9465176)
Supplement: MOESM1 [file 9465176]

Breast surgery

Patient acquisition and assessment for eligibility, n = 310

Inclusion criteria:

1. Patients, diagnosed with hormone-receptor-positive primary breast cancer
2. Scheduled to receive AET
3. Female, over 18 years old, able to speak and write German fluently, no severe depression or anxiety disorder, no schizophrenia or addiction

Enrollment and Informed consent  
n = 184

Tumor board review and patient education as usual

Additional standardized medical information about AET  
Baseline assessment ( $t_0$ )

Random allocation  
(stratified with depression scores (high vs. low) and type of medication (AI vs. Tam))

AET-intake

**Group 1:**  
Standard medical care (SMC)  
n = 55

**Group 2:**  
Standard medical care & Side-effect prevention training (SEPT)  
n = 55

**Group 3:**  
Standard medical care & Attention Control group (ACG)  
n = 55

Post-treatment assessment ( $t_1$ )

Follow-up assesment ( $t_2$  &  $t_3$ )  
(3 and 6 months after start of AET intake)
